# Supplementary material for: Photocatalytic hydrogen production over CdS: effects of reaction atmosphere studied by in situ Raman spectroscopy
Source: Royal Society of Chemistry journal article supplement (doi:10.1039/c4ta06577h), 2015-01-01
Supplement: c4ta06577h1.pdf [file c4ta06577h1.pdf]

*Supporting Information for*

**Photocatalytic hydrogen production over CdS: Effects of reaction  
atmosphere studied by *in situ* Raman spectroscopy**

*Lijing Ma\*, Maochang Liu, Dengwei Jing, Liejin Guo\**

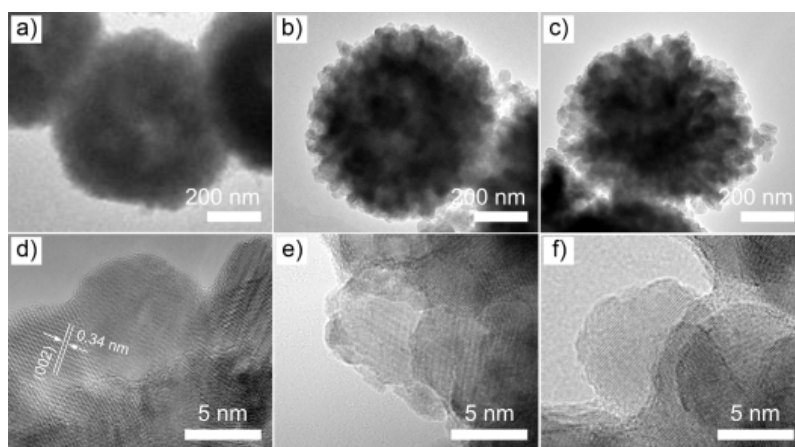

**Figure S1** TEM images of CdS (a,d) before and (b,c,e,f) after photocatalytic reaction under (b,e) air and (c,f) Ar.

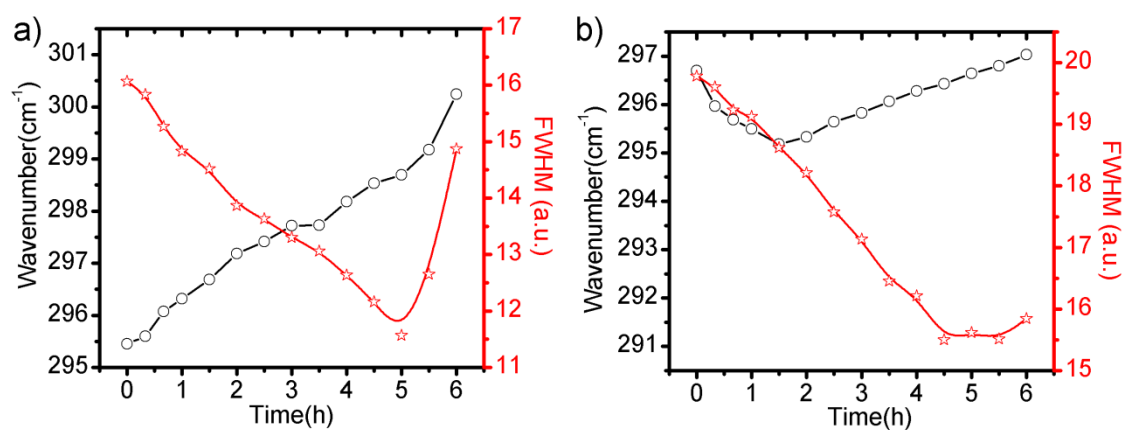

**Figure S2** Photocatalytic experiments with in situ Raman monitoring. a) Raman shift and FWHM of CdS 1LO peak determined from in-situ Raman spectra of CdS reacting under Ar/O<sub>2</sub> mixture containing 20% volume fraction of oxygen, and (b) Raman shift and FWHM of CdS 1LO peak determined from in-situ Raman spectra of CdS reacting in vacuum.
